# Supplementary material for: Prohexadione calcium enhances rice growth and tillering under NaCl stress
Source: PeerJ. 2023 Feb 6;11:e14804. doi: 10.7717/peerj.14804 (PMC9910188; doi:10.7717/peerj.14804)
Supplement: Data S1 — The mean ± standard error (SE), and different lowercase letters in the same column indicate that the mean values of replicates were significantly different among the treatments (p < 0.05). HHZ: Huanghuazhan rice cultivars. X900: Xiangliangyou900 rice cultivars. [file peerj-11-14804-s001.xlsx]

## Sheet: Fig.1
index	treatments	X900													HHZ
		7d	average number	standard error	significance	14d	average number	standard error	significance	21d	average number	standard error	significance		7d	average number	standard error	significance	14d	average number	standard error	significance	21d	average number	standard error	significance
tiller number	Control		1.6667	0.33333	ab		3.6667	0.33333	ab		4.3333	0.33333	b			1.6667	0.33333	ab		4	0	a		4.3333	0.33333	ab
	S		1	0	b		3	0	b		3.3333	0.33333	c			1	0	b		2.6667	0.33333	b		3.3333	0.33333	b
	Pro-Ca		2.3333	0.33333	a		4	0	a		5.3333	0.33333	a			2	0	a		4.3333	0.33333	a		4.6667	0.33333	a
	Pro-Ca+S		1.3333	0.33333	b		3.3333	0.33333	ab		4	0	bc			1.6667	0.33333	ab		3.6667	0.33333	a		4.3333	0.33333	ab
the number of leaves in main stems	Control		7.6667	0.33333	ab		11.3333	0.33333	a		12.6667	0.33333	a			7.6667	0.33333	b		11.6667	0.33333	b		12.6667	0.33333	b
	S		7	0	b		9.6667	0.33333	b		11.3333	0.33333	b			7	0	b		9	0	c		11.3333	0.33333	c
	Pro-Ca		8.3333	0.33333	a		11.6667	0.33333	a		13.3333	0.33333	a			9.6667	0.33333	a		12.6667	0.33333	a		14.3333	0.33333	a
	Pro-Ca+S		8	0	a		11.3333	0.33333	a		12.3333	0.33333	ab			7.3333	0.33333	b		12.3333	0.33333	ab		13.6667	0.33333	ab

## Sheet: Fig.2
index	treatments	X900					HHZ
		7d	average number	standard error	significance		7d	average number	standard error	significance
the tillering bud length	Control		0.6233	0.01764	b			0.5833	0.01453	a
	S		0.3033	0.01453	d			0.2467	0.02603	c
	Pro-Ca		0.85	0.01	a			0.5867	0.02603	a
	Pro-Ca+S		0.4867	0.01764	c			0.3333	0.03333	b

## Sheet: Fig.3
index	treatments	X900													HHZ
		7d	average number	standard error	significance	14d	average number	standard error	significance	21d	average number	standard error	significance		7d	average number	standard error	significance	14d	average number	standard error	significance	21d	average number	standard error	significance
root length	Control		27.0667	0.38442	a		32.0667	0.38442	a		35.9333	0.70553	b			30.9333	0.61734	a		33.7333	0.53645	b		36.7	0.35119	a
	S		23.0333	0.5696	b		26.2667	1.60243	b		29.9333	1.83151	c			23.0667	1.48586	b		29.8467	0.45112	c		29.3333	2.02841	b
	Pro-Ca		28.7333	0.84525	a		35.3	1.15902	a		42.1667	1.36423	a			31	0.15275	a		35.5667	0.46667	a		40.4667	1.32958	a
	Pro-Ca+S		26.5	1.25033	a		32.06	0.60308	a		36.8333	0.44096	b			30.7	0.77675	a		34.8333	0.44096	ab		40.1333	1.43333	a
stem base width	Control		12.9	0.26458	a		19.3667	0.1453	a		26.1	0.56862	a			14.8	0.75056	a		17.3667	0.69602	b		22.9333	0.1453	a
	S		9.1333	0.29627	b		15.1	0.70238	b		21.7333	0.79652	b			9.6	0.25166	c		14.0667	0.69362	c		18.3333	0.06667	b
	Pro-Ca		13.6333	0.21858	a		18.1333	0.47022	a		27.1667	1.30427	a			13.1	0.51962	ab		20.0667	0.89876	a		23	0.7	a
	Pro-Ca+S		13.1333	0.44096	a		18.6667	0.20276	a		26.3	1.0583	a			12.7333	0.58973	b		16.7333	0.27285	b		21.3667	0.91712	a

## Sheet: Fig.4
index	treatments	X900													HHZ
		7d	average number	standard error	significance	14d	average number	standard error	significance	21d	average number	standard error	significance		7d	average number	standard error	significance	14d	average number	standard error	significance	21d	average number	standard error	significance
SPAD values	Control		45.3	0.1	c		49.7	0.11547	b		47.8	0.05774	b			44.4667	0.1453	b		46.2667	0.1453	b		48.3	0.05774	b
	S		43.6333	0.06667	d		43.3667	0.06667	d		45.3333	0.12019	d			41.7	0.15275	d		43.1333	0.08819	d		43.4333	0.16667	d
	Pro-Ca		49	0.20817	a		51.1	0.20817	a		50.1667	0.31798	a			45.4	0.05774	a		49	0.1	a		50.7667	0.31798	a
	Pro-Ca+S		46.8333	0.24037	b		46.6	0.11547	c		46.3	0.2	c			43.5	0.15275	c		45.8667	0.08819	c		47.2667	0.06667	c

## Sheet: Fig.5
index	treatments	X900													HHZ
		7d	average number	standard error	significance	14d	average number	standard error	significance	21d	average number	standard error	significance		7d	average number	standard error	significance	14d	average number	standard error	significance	21d	average number	standard error	significance
Pn	Control		22.2333	0.23333	ab		19.4333	0.47022	a		17.1333	0.41767	b			25.3	0.34641	b		20.4333	0.73106	ab		15.4	0.3	b
	S		19.1	0.9815	c		17.5667	0.18559	b		12.3	0.34641	c			19.6333	0.41767	c		18.3333	0.51747	c		11.7	0.47258	c
	Pro-Ca		23.7333	0.12019	a		19.9667	0.3383	a		18.6667	0.55478	a			26.6667	0.31798	a		21.1	0.32146	a		16.8667	0.27285	a
	Pro-Ca+S		21.2	0.1	b		19.5667	0.18559	a		16.2667	0.31798	b			24.7	0.26458	b		19.3333	0.1453	bc		14.5333	0.27285	b
Gs	Control		0.469	0.02053	b		0.5207	0.01826	ab		0.616	0.03431	a			0.703	0.02951	ab		0.458	0.02335	b		0.516	0.05237	a
	S		0.393	0.04704	b		0.276	0.01266	c		0.2317	0.00797	c			0.5603	0.01576	b		0.3437	0.02621	c		0.245	0.01531	c
	Pro-Ca		0.8113	0.05239	a		0.551	0.03057	a		0.6427	0.0407	a			0.79	0.05231	a		0.656	0.01457	a		0.511	0.02434	a
	Pro-Ca+S		0.4903	0.03688	b		0.4703	0.00677	b		0.4133	0.00524	b			0.651	0.05656	ab		0.492	0.0374	b		0.4093	0.01299	b
Ci	Control		285	7.76745	a		298	1.52753	a		325.667	2.33333	a			306.333	3.1798	a		290.667	1.85592	bc		324.333	4.25572	a
	S		281	10.1489	a		259.333	3.38296	b		293	2.08167	c			306.667	3.75648	a		279	4.04145	c		301.667	0.88192	b
	Pro-Ca		301.667	1.85592	a		299.333	2.60342	a		321.333	1.66667	a			306.333	3.52767	a		310.667	0.88192	a		317.667	3.92994	a
	Pro-Ca+S		285.333	4.37163	a		293	1	a		309	0.57735	b			304	2.51661	a		299.667	5.81187	ab		316	1.52753	a
Tr	Control		9.5667	0.30322	b		18	0.50332	a		7.2133	0.20883	a			12.0667	0.23333	ab		15.6	0.69282	b		6.4633	0.44126	a
	S		8.2567	0.32682	c		8.6833	1.57337	b		4.04	0.04726	c			10.2567	0.15452	c		13	0.70946	c		4.0433	0.19539	b
	Pro-Ca		11.4	0.26458	a		18.3667	0.47022	a		7.36	0.28219	a			12.9	0.37859	a		18.5667	0.3383	a		6.5433	0.18095	a
	Pro-Ca+S		9.2067	0.32043	bc		16.6333	0.08819	a		5.8667	0.03844	b			11.6333	0.49103	b		16.2333	0.70553	b		5.8733	0.06333	a

## Sheet: Fig.6
index	treatments	X900													HHZ
		7d	average number	standard error	significance	14d	average number	standard error	significance	21d	average number	standard error	significance		7d	average number	standard error	significance	14d	average number	standard error	significance	21d	average number	standard error	significance
MDA	Control		5.1857	0.23172	a		2.469	0.03474	c		3.2411	0.01526	b			4.1186	0.0833	b		3.0422	0.01146	b		1.9931	0.01353	b
	S		5.1505	0.09592	a		5.4578	0.11005	a		5.0148	0.03439	a			4.525	0.12394	a		4.5037	0.09803	a		4.6402	0.07848	a
	Pro-Ca		3.3644	0.148	c		5.5974	0.1104	a		2.4257	0.02675	c			3.8763	0.09093	b		1.9641	0.01972	d		1.9731	0.05499	b
	Pro-Ca+S		4.3837	0.21286	b		2.9784	0.01149	b		2.3484	0.05274	c			3.9604	0.03306	b		2.5521	0.02938	c		4.6354	0.01179	a
electrolyte leakage rate	Control		25.5892	1.31663	c		55.3315	0.77081	d		54.472	0.25506	d			31.96	0.32817	c		55.034	1.75503	d		55.1746	0.5484	c
	S		43.4317	1.34793	a		69.7429	1.02296	a		62.5017	0.10002	a			51.909	1.63587	a		75.5161	0.58959	a		63.7971	0.4912	a
	Pro-Ca		33.9977	0.81076	b		58.8711	0.26776	c		55.5617	0.20387	c			33.4384	0.14825	c		63.2977	0.62091	c		58.9344	0.08134	b
	Pro-Ca+S		36.2397	0.88956	b		61.5131	0.51198	b		57.5392	0.24844	b			39.1339	0.12244	b		68.9882	0.43576	b		59.4426	0.12867	b

## Sheet: Fig.7
index	treatments	X900													HHZ
		7d	average number	standard error	significance	14d	average number	standard error	significance	21d	average number	standard error	significance		7d	average number	standard error	significance	14d	average number	standard error	significance	21d	average number	standard error	significance
SOD	Control		345.09	0.04826	c		325.895	0.16868	d		325.184	0.1663	c			345.468	0.05238	c		315.954	0.15719	d		332.647	1.04001	c
	S		346.811	0.03543	b		345.88	0.67136	c		336.665	0.52392	b			346.084	0.24226	c		320.855	1.06603	c		336.836	0.07454	b
	Pro-Ca		347.51	0.2283	a		358.581	1.01261	a		340.707	0.42974	a			349.546	0.36998	b		342.335	0.34634	a		341.729	0.11822	a
	Pro-Ca+S		347.32	0.17601	a		352.654	0.02208	b		339.62	0.14513	a			350.889	0.0954	a		328.344	0.40004	b		337.5	0.16309	b
CAT	Control		100.933	23.1877	a		106	22.8537	b		132.8	33.0244	a			81	11.2006	b		87.5	11.3738	c		156.4	26.4757	a
	S		130.6	16.5122	a		123.6	19.6666	ab		124	3.27414	a			121.4	13.0481	ab		144.4	7.85196	b		170.8	15.0111	a
	Pro-Ca		165.8	23.6714	a		136.4	31.1718	ab		154.6	38.9134	a			183.2	38.567	a		144.4	7.85196	b		207.467	39.6204	a
	Pro-Ca+S		137	22.5167	a		182	1.84752	a		143.6	42.493	a			169.467	13.5574	a		217.6	26.5038	a		182.4	10.6232	a
APX	Control		876.167	11.7553	d		969	32.1436	c		758.167	9.71208	d			936.333	22.583	d		687.533	18.4146	c		700.833	12.2102	d
	S		1063.03	18.0741	c		1179.17	8.71786	b		848.767	12.1882	c			1057.17	7.96457	c		758.333	10.7854	c		806.5	12.4589	c
	Pro-Ca		1289.27	5.66284	a		1352.47	23.3849	a		1255.6	25.6287	a			1319.6	12.265	a		1088.6	60.8508	a		1137.77	15.78	a
	Pro-Ca+S		1170.9	5.17397	b		1282.37	21.666	a		1072.37	20.8273	b			1228.13	2.18352	b		875.6	14.7959	b		948.367	11.8672	b
POD	Control		16473.8	244.667	d		14468.2	152.604	d		12279.7	74.6598	d			23124.7	75.6924	b		13464.5	126.036	d		23544.2	221.204	d
	S		19715.2	103.353	c		18199.5	36.4472	c		13385.1	180.823	c			22623.9	70.7599	c		15653.9	284.544	c		24541.8	193.023	c
	Pro-Ca		20535.8	242.663	b		23220.2	132.993	a		26945.2	34.7943	a			24739	120.842	a		17373.3	232.293	b		30385.3	324.639	a
	Pro-Ca+S		23702.8	73.224	a		21148.9	343.458	b		25280.2	219.818	b			24706.2	114.445	a		19370.9	190.279	a		26746.4	252.348	b

## Sheet: Fig.8
index	treatments	X900													HHZ
		7d	average number	standard error	significance	14d	average number	standard error	significance	21d	average number	standard error	significance		7d	average number	standard error	significance	14d	average number	standard error	significance	21d	average number	standard error	significance
soluble protein content	Control		19.7425	0.1004	c		19.9412	0.15796	c		18.75	0.23052	d			21.0076	0.02355	c		19.5126	0.0499	d		17.8709	0.10908	c
	S		20.7972	0.02612	b		20.3537	0.01441	b		19.1969	0.03829	c			21.2818	0.06855	b		20.065	0.05356	c		18.9709	0.03674	b
	Pro-Ca		21.3374	0.02578	a		21.723	0.05953	a		21.5225	0.0594	a			21.6989	0.01375	a		21.4004	0.01445	a		21.2058	0.04325	a
	Pro-Ca+S		20.8804	0.02065	b		21.5187	0.01831	a		20.6648	0.03599	b			21.6634	0.06263	a		20.333	0.06055	b		21.1022	0.00912	a

## Sheet: Table1
index	treatments	X900													HHZ
		7d	average number	standard error	significance	14d	average number	standard error	significance	21d	average number	standard error	significance		7d	average number	standard error	significance	14d	average number	standard error	significance	21d	average number	standard error	significance
tiller angle	Control		26.7	1.7	a		26.7	3.3	a		28.3	1.7	a			25	2.9	ab		30	0	a		23.3	3.3	a
	S		10	0	b		13.3	3.3	b		23.3	3.3	a			13.3	3.3	b		23.3	1.7	b		20	0	a
	Pro-Ca		23.3	3.3	a		26.7	3.3	a		30	0	a			28.3	4.4	a		30	0	a		26.7	3.3	a
	Pro-Ca+S		23.3	3.3	a		23.3	3.3	ab		26.7	3.3	a			23.3	3.3	ab		28.3	1.7	a		23.3	3.3	a
plant height	Control		55.8333	0.26034	a		62.8	0.25166	a		73.1667	0.08819	a			54	0.05774	a		61.5667	0.20276	a		74.7667	0.23333	a
	S		48.6	0.15275	b		57.4	0.23094	b		66.8	0.52915	b			48.3	0.2	b		56.1	0.32146	b		66.2333	0.13333	b
	Pro-Ca		44.2	0.11547	d		49.8333	0.29059	d		63.4	0.23094	d			42.9333	0.37565	d		50	0.05774	d		63.9667	0.26034	d
	Pro-Ca+S		47.4667	0.08819	c		52.5667	0.08819	c		65.6	0.11547	c			45.2	0.25166	c		53.9333	0.18559	c		65.3667	0.24037	c
leaf area	Control		3963.4	157.376	ab		6009.9	365.941	a		6891.7	120.917	a			3569.13	86.588	a		4956.6	284.264	ab		5844.9	90.5529	a
	S		3415.47	14.4978	b		3990.97	143.358	b		4988.13	114.097	d			2273.1	131.437	b		3318.93	201.317	c		3440.1	156.866	c
	Pro-Ca		4365.27	401.041	a		5900.13	305.794	a		6227.3	125.951	b			3849.57	82.2726	a		5625.17	227.387	a		6314.13	222.669	a
	Pro-Ca+S		3904.53	7.319	ab		5323.67	48.2221	a		5808.17	5.60991	c			3661.7	28.0293	a		4620.57	132.899	b		5013.83	57.1093	b

## Sheet: Table2
index	treatments	X900													HHZ
		7d	average number	standard error	significance	14d	average number	standard error	significance	21d	average number	standard error	significance		7d	average number	standard error	significance	14d	average number	standard error	significance	21d	average number	standard error	significance
Shoot fresh weight	Control		3.4786	0.44648	b		8.649	0.11766	b		15.6598	0.18942	a			3.6741	0.01967	b		7.8301	0.08368	b		15.6625	0.19341	a
	S		2.7319	0.05588	b		7.1282	0.05011	c		12.2794	0.30208	c			2.0782	0.06532	d		5.3581	0.22801	d		10.5445	0.17065	c
	Pro-Ca		4.4262	0.2424	a		10.3236	0.54595	a		16.1107	0.14686	a			3.9324	0.12851	a		9.1533	0.12511	a		16.2861	0.29605	a
	Pro-Ca+S		3.5562	0.16643	ab		8.1891	0.13347	b		14.8181	0.12663	b			2.9625	0.00657	c		7.1635	0.26845	c		13.792	0.02939	b
Root fresh weight	Control		1.3994	0.02239	b		4.4791	0.2167	b		7.5917	0.14844	b			1.5611	0.01008	b		3.7778	0.10824	b		7.8132	0.13013	b
	S		1.0274	0.02399	c		2.4569	0.04166	d		5.4239	0.02693	d			0.7775	0.01882	d		2.1276	0.04776	d		4.1575	0.06849	d
	Pro-Ca		1.5774	0.05222	a		5.2803	0.06219	a		8.8845	0.17494	a			1.6481	0.01327	a		4.2903	0.08472	a		8.4824	0.03136	a
	Pro-Ca+S		1.342	0.00494	b		4.1016	0.01946	c		6.821	0.15241	c			1.4977	0.00819	c		3.3479	0.05787	c		6.3662	0.06049	c
Shoot dry weight	Control		0.579	0.00776	b		1.2507	0.0093	b		2.0538	0.01981	b			0.569	0.02992	b		1.2344	0.00692	b		2.4295	0.04573	b
	S		0.3756	0.00966	d		1.0365	0.03198	d		1.7951	0.02247	d			0.3438	0.01295	d		0.7987	0.00955	d		1.7554	0.03183	d
	Pro-Ca		0.7106	0.00739	a		1.4324	0.02299	a		2.4521	0.02065	a			0.6374	0.0097	a		1.4048	0.02742	a		2.7007	0.03438	a
	Pro-Ca+S		0.5298	0.00163	c		1.1722	0.02166	c		1.8911	0.02099	c			0.4865	0.00919	c		1.1452	0.01688	c		2.2801	0.0453	c
Root dry weight	Control		0.1355	0.00073	b		0.4757	0.00762	b		0.9	0.00983	b			0.157	0.0007	b		0.3655	0.00219	b		0.967	0.02548	b
	S		0.0567	0.00575	d		0.272	0.01109	c		0.6442	0.00545	c			0.0705	0.00235	d		0.2486	0.00989	d		0.4546	0.01184	d
	Pro-Ca		0.1471	0.00252	a		0.619	0.01352	a		1.1151	0.06252	a			0.1761	0.0018	a		0.4012	0.00162	a		1.0468	0.01889	a
	Pro-Ca+S		0.1104	0.0006	c		0.4451	0.00444	b		0.8611	0.00519	b			0.1441	0.00147	c		0.3211	0.00111	c		0.8328	0.01972	c
